# Supplementary material
Source: Springer Nature journal article supplement (https://www.springermedizin.de/resource/supplementary/12958_2008_439_MOESM10_ESM.pdf/9567888)

PT: COW01R  
ID:  
RBRU-U OF S  
C9-5 ICT  
SPTAD-18M107  
HDOB C6 E4  
HDI

29 MAY 93  
2:22 PM

AVI

1

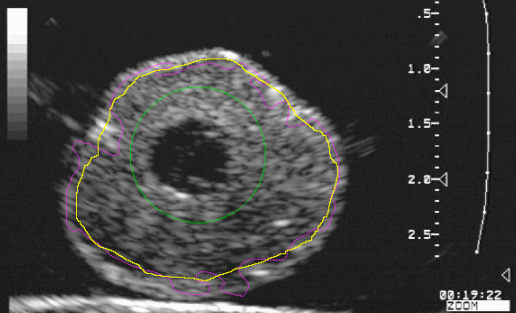

PT: COW 07R  
ID:  
RBRU-U OF S  
C9-5 ICT  
SPTAD-18M107  
HDOB C7 E5  
HDI

18 MAY 93  
10:39 AM

AVI

2

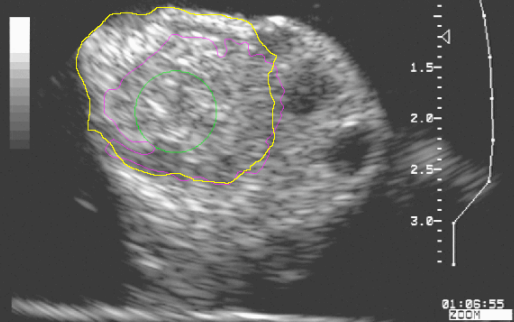

PT: COW 15R  
ID:  
RBRU-U OF S  
C9-5 ICT  
SPTAD-18M107  
HDOB C6 E4  
HDI

27 MAY 93  
6:45 PM

AVI

3

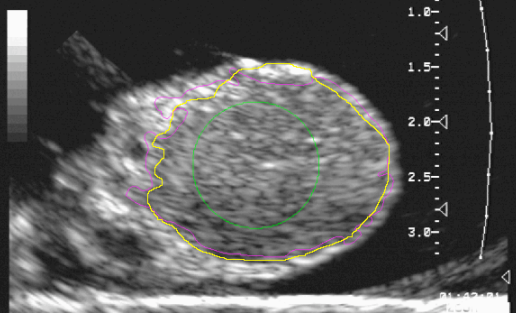

PT: COW 31L  
ID:  
RBRU-U OF S  
C9-5 ICT  
SPTAD-18M107  
HDOB C6 E4  
HDI

10 JUN 93  
10:02 AM

AVI

4

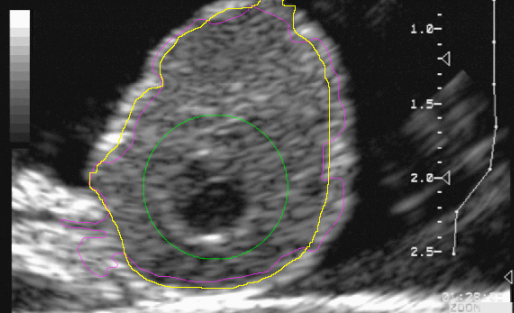

Supplement: MOESM10 [file 9567888]
